# Supplementary material for: Readiness for cancer rehabilitation in Denmark: protocol for a cross-sectional mixed methods study
Source: PubMed Central journal article supplement — BMJ Open. 2013 Nov 19;3(11):e003775. doi: 10.1136/bmjopen-2013-003775 (PMC3840349; doi:10.1136/bmjopen-2013-003775), 2013-11-19
Supplement: bmjopen-2013-003775.draft_revisions.pdf [file bmjopen-2013-003775.draft_revisions.pdf]

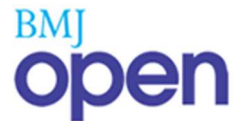

**Readiness for cancer rehabilitation in Denmark: protocol for  
a cross-sectional  
mixed methods study**

|                                    |                                                                                                                                                                                                                                                                                           |
|------------------------------------|-------------------------------------------------------------------------------------------------------------------------------------------------------------------------------------------------------------------------------------------------------------------------------------------|
| Journal:                           | <i>BMJ Open</i>                                                                                                                                                                                                                                                                           |
| Manuscript ID:                     | bmjopen-2013-003775                                                                                                                                                                                                                                                                       |
| Article Type:                      | Protocol                                                                                                                                                                                                                                                                                  |
| Date Submitted by the Author:      | 10-Aug-2013                                                                                                                                                                                                                                                                               |
| Complete List of Authors:          | Kristiansen, Maria; University of Copenhagen, Department of Public Health<br>Adamsen, Lis; Copenhagen University Hospital, UCSF<br>Hendriksen, Carsten; Copenhagen University, Faculty of Health, Institute of<br>Public Health                                                           |
| <b>Primary Subject<br>Heading</b>: | Oncology                                                                                                                                                                                                                                                                                  |
| Secondary Subject Heading:         | Health services research                                                                                                                                                                                                                                                                  |
| Keywords:                          | REHABILITATION MEDICINE, Adult oncology < ONCOLOGY, Organisation of<br>health services < HEALTH SERVICES ADMINISTRATION & MANAGEMENT,<br>Quality in health care < HEALTH SERVICES ADMINISTRATION &<br>MANAGEMENT, Protocols & guidelines < HEALTH SERVICES<br>ADMINISTRATION & MANAGEMENT |
|                                    |                                                                                                                                                                                                                                                                                           |

SCHOLARONE™  
Manuscripts

1  
2  
3  
4  
5 **Readiness for cancer rehabilitation in Denmark: protocol for a cross-sectional**  
6 **mixed methods study**  
7

8 Maria Kristiansen, Lis Adamsen, Carsten Hendriksen  
9

10  
11  
12 Department of Public Health, University of Copenhagen, Oester Farimagsgade 5A, 1014  
13 Copenhagen K, Denmark.

14 Maria Kristiansen, associate professor

15 Lis Adamsen, professor

16 Carsten Hendriksen, associate professor  
17  
18  
19  
20  
21  
22  
23

24 Correspondence to: Maria Kristiansen

25 Email: Makk@sund.ku.dk

26 Telephone: +45 35326250

27 Fax: +45 35327629  
28  
29  
30  
31  
32

33  
34 Keywords: rehabilitation medicine, adult oncology, organisation of health services, quality of health  
35 care, protocols & guidelines  
36  
37  
38  
39  
40  
41  
42  
43  
44  
45  
46  
47  
48  
49  
50  
51  
52  
53  
54  
55  
56  
57  
58  
59  
60

## ABSTRACT

**Introduction:** Rehabilitation is a key element in most cancer care policies in recognition of the often unmet physical, psychological and social needs among rising numbers of cancer patients. A systematic assessment of patients' needs and available rehabilitation services constitute the foundation for timely, comprehensive, and coordinated cancer rehabilitation. This study aims to provide insight into the current organisation and practice of cancer rehabilitation in Denmark with special emphasis placed upon assessments of patients' needs and availability of services across the cancer treatment trajectory.

**Methods and analysis:** A cross-sectional design using a mixed methods approach will be used in order to analyse the readiness for cancer rehabilitation in different sectors and from differing perspectives. Substudy I consists of an electronic survey among the 98 Danish municipalities and focuses on the availability and use of cancer rehabilitation services for patients with all types of cancers. In substudy 2, a survey among the 19 surgical and 12 oncological departments involved in colorectal cancer treatment in Denmark is conducted in order to describe the current clinical practice regarding assessment of rehabilitation needs and referral to services. Substudy 3 involves a retrospective clinical audit and semistructured interviews at 4 randomly selected surgical and oncological departments treating colorectal cancer patients in order to elucidate current needs assessment practices.

**Ethics and dissemination:** The study was approved by the Danish Data Protection Agency and will be conducted in accordance with the principles of the Helsinki Declaration. Representatives from municipalities and clinical practice are engaged in the design and execution of the study in order to ensure the usefulness of survey instruments, reflexive interpretation of data and transferral of implications into practice. Results will be published in international peer-reviewed scientific journals and presented at conferences, seminars and as short reports.

## ARTICLE SUMMARY

### Article focus

- This cross-sectional, mixed methods study explores the organisation and practice of cancer rehabilitation in Denmark with specific emphasis on assessments of patients' needs and availability of services in different phases of the cancer treatment trajectory.

### Key messages

- Systematic assessment of cancer patients' rehabilitation needs is a necessity in order to identify patients with unmet needs and refer these patients to appropriate rehabilitation services.
- There is a need for more attention to potential gaps between policies on cancer rehabilitation on the one hand and the emphasis placed on rehabilitation in actual patient-provider encounters in different phases of the cancer treatment trajectory on the other.

### Strengths and limitations of this study

- The study provides insight into current practices regarding assessment of patients' rehabilitation needs and referral to rehabilitation services in a cross-sectional perspective, thereby encompassing large parts of the care pathway from the onset of treatment in hospitals and into the community.
- The study will enable the identification of gaps between policies and practice, and point to strategies of overcoming these gaps. The findings from this study thus hold great potential both in informing future policy-making within the field of cancer rehabilitation and in enabling better implementation of these policies across different sectors of healthcare systems.
- The findings of this study are context-dependent as the organization of cancer rehabilitation (e.g. delineation of care responsibilities across sectors, out-of-pocket payments, and referral routes) vary between countries with impact on rehabilitation practices. Therefore, findings need to be properly contextualized and caution must be taken in transferring implications for practice to healthcare systems characterized by different funding, governance and provision compared to the Danish publicly funded healthcare system.

## INTRODUCTION

Increasing attention focuses on how to adapt healthcare systems to meet the complex physical, psychological and social needs among the growing number of cancer patients.[1-3] Rehabilitation needs are complex and shaped by disease severity, the complexity of surgical and oncological treatments, as well as patient characteristics such as age, co-morbid conditions, health behaviour and socioeconomic position.[4,5] Principles underpinning cancer rehabilitation programmes are a biopsychosocial understanding of illness, focus on early assessment of needs and an emphasis on securing a continuous and tailored rehabilitation plan encompassing both needs and resources for the individual patients and his/her relatives.[2,3,6] Timely, comprehensive and coordinated cancer rehabilitation entails both systematic screening of those patients in need of rehabilitation services and it necessitates available and accessible high-quality services for the subgroup of patients who need organised cancer rehabilitation during and following cancer treatment. Throughout the cancer treatment trajectory, patients' physical, psychological and social needs may change and different service providers situated in primary care, at hospitals and in the communities where patients live are therefore relevant key persons in the cancer rehabilitation. Correspondingly, a multitude of interventions targeting rehabilitation needs should be made available for those who need help in managing the consequences of cancer. Cancer rehabilitation therefore comprises a wide range of activities such as physical training, psychological counselling, information on economic and work-related issues, and support groups.

In the research literature, unmet rehabilitation needs have been documented among a substantial proportion of current and former cancer patients with negative effect on quality of life, ability to return to work and morbidity.[5,7-12] Reasons for this suboptimal situation are complex and rooted in an interplay of patient-, provider- and organisational factors influencing access to and use of appropriate services.[13,14] Communication barriers in the patient-provider encounter and between providers, insufficient support for providers in screening for rehabilitation needs, suboptimal care coordination, lack of clear delineation of responsibility among providers, and a mismatch between available services and patient preferences are just some of these explanatory factors.[15-17] Calls have been made for more comprehensive cancer care plans that address the multitude of rehabilitation needs experienced by cancer patients and contextualise these needs in the immediate and wider social circumstances of each patient.[1,13,18] Several countries have developed policies seeking to integrate rehabilitation into the cancer treatment trajectory.[2,3,19,20] Implementing these policies into practice may be challenging, particularly as comprehensive cancer treatment trajectories involve a range of health and social care providers from primary and secondary care, and increasingly also community-based organisations including municipalities and patient organisations.

Within accelerated clinical care pathways, securing timely and systematic assessment of cancer patients' rehabilitation needs and subsequent referral to appropriate rehabilitation services across sectors and across time is a challenge that needs to be overcome if the potential benefits of comprehensive cancer rehabilitation services are to be realised. Insight into the current organisation of cancer rehabilitation is needed in order to analyse gaps between policy recommendations and practice and subsequently devise strategies enabling the realisation of the goal of coordinated, comprehensive cancer rehabilitation for those patients who need this.

Differences in the organisation and management of healthcare systems influence the organisation and management of cancer rehabilitation.[2] Geographical distances to services or lack of health

1  
2  
3  
4 insurance coverage may impede access to cancer rehabilitations in e.g. the U.S. whereas barriers in  
5 countries with tax-financed healthcare services covering populations living in smaller geographical  
6 areas may be of a different nature. This study explores cancer rehabilitation in Denmark which is a  
7 rather small country with a total of 5.6 million inhabitants. Politically and administratively,  
8 Denmark is divided into three levels each involved in the planning and delivery of healthcare  
9 services: the state, 5 regions and 98 municipalities.[21] The Danish cancer management programme  
10 published in 2012 outlines the overall integrated and coordinated organisation of cancer  
11 rehabilitation which has to be implemented by 2013.[22] In terms of cancer rehabilitation,  
12 municipalities are responsible for organising rehabilitation at a general level whereas hospitals are  
13 required to provide highly specialised rehabilitation for those patients who need this. Services are  
14 free of charge and time-limited involving a specified number of activities for each patient. Patients  
15 are referred to these services either by their general practitioner or by oncologists/medical staff at  
16 hospitals. In addition to this national cancer care plan, integrated care plans have been developed  
17 for specific cancers including colorectal cancer.[23]  
18  
19

20  
21 Our aim with this cross-sectional, mixed methods study is to provide insight into the organisation  
22 and practice of cancer rehabilitation in Denmark with special emphasis placed upon assessments of  
23 patients' needs and availability of services in different phases of cancer treatment trajectories  
24 involving different sections of the healthcare system. We explore this in three substudies. In  
25 substudy 1, the availability and use of cancer rehabilitation services targeting all types of cancers  
26 are explored in a survey among all Danish municipalities. In substudy 2 and 3, we narrow our focus  
27 to colorectal cancer patients who comprise a large, diverse and understudied group of cancer patients  
28 and in addition often experience multiple and complex rehabilitation needs.[24-27] In substudy 2,  
29 we use survey methodology to describe the current clinical practice regarding assessment of  
30 rehabilitation needs and referral to appropriate services in surgical and oncological departments  
31 treating patients with colorectal cancer. Finally in substudy 3, we conduct a clinical audit exploring  
32 the systematic identification and documentation of rehabilitation needs in patient files among four  
33 randomly selected surgical and oncological departments treating colorectal cancer patients.  
34  
35

36 By combining different perspectives and different methodologies, this study will enable the  
37 identification of gaps between the principles of comprehensive, coordinated rehabilitation as  
38 stipulated by the Danish cancer management programme and the current practice in the clinical  
39 encounter and after patients' transition to community-based cancer care. Insight into encountered  
40 barriers for cancer rehabilitation and strategies developed to overcome these barriers, may inform  
41 future development and implementation of policies seeking to integrate rehabilitation into the  
42 cancer treatment trajectory.  
43  
44

## 45 46 **METHODS AND ANALYSIS**

47 This study uses a cross-sectional design based on a mixed methods approach in order to analyse the  
48 readiness for rehabilitation in different phases of the cancer treatment trajectory.[28] The study is  
49 divided into three substudies, each of which will be conducted subsequently. Preliminary results of  
50 each substudy will feed into the design of the following substudy. Table 1 provides an overview of  
51 the aim, methodology, data sources/types of respondents and analysis of the three substudies.  
52  
53  
54

### 55 **Table 1: Overview of aim, methodology, data sources and analysis of each substudy**

56  
57  
58  
59  
60

| Substudy   | Aim                                                                                                                       | Methodology                                                | Data sources/respondents                                                                                                                                                                                   | Analysis                                       |
|------------|---------------------------------------------------------------------------------------------------------------------------|------------------------------------------------------------|------------------------------------------------------------------------------------------------------------------------------------------------------------------------------------------------------------|------------------------------------------------|
| Substudy 1 | Explores availability and use of cancer rehabilitation services in community-settings for all cancers                     | Nationwide survey                                          | Danish municipalities (n=98)                                                                                                                                                                               | Descriptive statistics and content analysis    |
| Substudy 2 | Explores assessment of rehabilitation needs and referral to services within clinical care for colorectal cancer patients  | Nationwide survey                                          | Danish surgical and oncological departments treating colorectal cancer (n=31)                                                                                                                              | Descriptive statistics and content analysis    |
| Substudy 3 | Explores the identification and documentation of rehabilitation needs within clinical care for colorectal cancer patients | Retrospective clinical audit<br><br>Qualitative interviews | Random sample of patient files (n=40) compiled from Danish surgical (n=2) and oncological (n=2) departments treating colorectal cancer<br>Representatives from each department involved in the audit (n=4) | Descriptive statistics<br><br>Content analysis |

In the following sections, each substudy will be described briefly.

### **Substudy 1: nationwide survey among Danish municipalities**

According to the Danish cancer management programme, all municipalities should offer cancer rehabilitation as of the beginning of 2013.[22] In order to capture the baseline situation and to lay the foundation for the following substudies, the data collection for substudy 1 was initiated in January 2013.

An electronic questionnaire consisting of 29 items measuring availability and use of cancer rehabilitation services is developed based on a review of cancer rehabilitation literature and cancer care policies, and discussions within a multidisciplinary group of cancer rehabilitation researchers. A combination of closed and open-ended questions is chosen in order to solicit additional information from respondents.

Items concern available rehabilitation services for cancer patients; reasons for not offering these services; target groups in terms of type of cancer, timing, setting and content of services;

1  
2  
3  
4 organisation of services including staffing, economic resources and collaboration with other public  
5 or private actors; number of patients enrolled in cancer rehabilitation; inequality in use across  
6 different patient groups in terms of type of cancer, sex, age, socioeconomic position and ethnicity,  
7 and perceived reasons for observed inequality; perception of and attitude towards cancer  
8 rehabilitation offered by municipalities; and needs and lessons learned in providing cancer  
9 rehabilitation. In addition, respondents are invited to send descriptions and evaluations of existing  
10 cancer rehabilitation services to the research team.

11 When appropriate, respondents are able to choose more than one answer to questions, and they are  
12 able to skip sections of the questionnaire that do not apply to them (e.g. questions on content and  
13 use of services which are not applicable to those municipalities reporting that they do not offer  
14 cancer rehabilitation services) or questions that they do not know the answer to.

15 The questionnaire is pilot-tested by representatives from two municipalities; one situated in an  
16 urban context, one in a rural area in order to secure usefulness across geographical settings. In  
17 addition, a representative from an interest group and member authority for Danish municipalities  
18 (Local Government Denmark) are invited to comment on the questionnaire.

19 The person in charge of cancer rehabilitation services in each of the 98 Danish municipalities are  
20 identified and send the questionnaire via SurveyXact in January 2013. Two reminders are sent; one  
21 in written and one by telephone.

22 Data will be analysed using descriptive statistics. Answers to open-ended questions will be coded  
23 using content analysis and statements that are considered illustrative for these data will be selected  
24 and used in the following presentation of results.

## 25 26 27 28 29 30 **Substudy 2: nationwide electronic survey among surgical and oncological departments for** 31 **colorectal cancer patients**

32 Substudy 2 explores the current clinical practice regarding assessment of rehabilitation needs and  
33 referral to appropriate services in the 19 surgical and 12 oncological departments treating patients  
34 with colorectal cancer in Denmark. Data collection for this substudy started in July 2013.

35 Two electronic questionnaires have been developed; one for each type of department involved in  
36 colorectal cancer treatment. Most items (20 in total) are similar for the two types of respondents,  
37 however respondents from surgical departments are asked an additional question regarding the  
38 extent of implementation of fast-track programmes at the specific department as such programmes  
39 may influence the ways in which cancer rehabilitation is conceptualised and reported in the  
40 survey.[29] As in substudy 1, we use a combination of closed and open-ended questions. Items  
41 measure types of disease-specific and general rehabilitation needs are systematically assessed and  
42 documented; communication and collaboration within and across hospital departments (surgical and  
43 oncological departments) and across sectors (general practice and municipalities); referral to  
44 rehabilitation services and information provided to patients; and attitudes towards cancer  
45 rehabilitation emphasising on the perceived relevance of and the strength of the evidence-base  
46 underlying current rehabilitation services for colorectal cancer patients. Items are developed based  
47 on review of the scientific literature, as well as the Danish cancer management programme and the  
48 Danish integrated care plan for colorectal cancer.[22,23] Representatives from the Danish  
49 Colorectal Cancer Group are engaged in the development of the questionnaire and were invited in  
50 as collaborating partners during this substudy in order to secure the usefulness of the questionnaire  
51 and improve the likelihood that results will be translated into improvements of clinical practice.  
52 When appropriate, respondents may choose more than one answer to questions, and based on our  
53 experiences from substudy 1, we retain the possibility for respondents to skip sections of the  
54 questionnaire that do not apply to them or that they are unable to answer.  
55  
56  
57  
58  
59  
60



1  
2  
3  
4 The size and management structures of departments treating colorectal cancer patients vary across  
5 Danish hospitals, and identifying the most relevant recipient poses a challenge. Questionnaires are  
6 therefore initially sent to all heads of departments via SurveyXact. These recipients are easily  
7 identifiable and are asked to forward the questionnaire to the relevant clinician in charge of the  
8 departments' colorectal cancer treatment programme. Two written reminders will be sent to non-  
9 responders.

10 Data from closed-ended questions will be analysed using descriptive statistics. Answers to open-  
11 ended questions will be coded using content analysis.  
12  
13

### 14 15 **Substudy 3: retrospective clinical audit among four randomly selected surgical and** 16 **oncological units for colorectal cancer patients**

17 In the final substudy, we conduct a retrospective clinical audit exploring the systematic  
18 identification and documentation of rehabilitation needs in patient files compiled from two surgical  
19 and two oncological departments treating colorectal cancer patients. A total of 10 patient files  
20 (electronic and/or written dependent upon availability) will be extracted from each department  
21 resulting in a total of 40 patient files included. Departments will be randomly selected among the 19  
22 surgical and 12 oncological departments enrolled in substudy 2. No selection criteria will be  
23 enforced besides geographical spread in order to ensure attention to potential regional differences  
24 between eastern and western parts of Denmark. Each surgical department will be asked to retrieve  
25 full patient files for the last 10 patients operated for colorectal cancer at the department. Due to the  
26 more prolonged treatment modules within oncology and to ensure that full care trajectories are  
27 covered in the audit, each oncological department will be asked to retrieve patient files for the last  
28 10 patients who have been enrolled in treatment for at least 7 months.  
29

30 The clinical audit will be carried out in accordance with the Principles for Best Practice in clinical  
31 Audit published by the National Institute for Clinical Excellence.[30] The audit will focus on  
32 systematic documentation of patients' rehabilitation needs and referral to rehabilitation services in  
33 clinical practice. Explicit, measurable process criteria indicating assessment of patients'  
34 rehabilitation needs across the cancer treatment trajectory will be developed. Criteria will  
35 encompass direct measures for rehabilitation needs assessments (e.g. functional ability, co-morbid  
36 conditions, mental distress, social network structure) and indirect measures (e.g. referral to  
37 physiotherapy/dietician/psychologist, information given to the patient regarding municipal  
38 rehabilitation services).  
39

40 Representatives from the involved departments will be engaged as collaborating partners as their  
41 active participation will help ensure both access to data from patient files, adequate selection of  
42 assessment criteria and measurement of performance, and not least the translation of findings into  
43 improvements of clinical practice.[30] Patient files will be systematically reviewed by two  
44 independent and trained reviewers; one from the research team and one representative from the  
45 specific department in order to secure validity and consistency in the measurement of performance.  
46 Ratings will be compared and consensus sought between reviewers.  
47

48 The audit methodology is based on measurable indicators of cancer rehabilitation as identified in  
49 electronic or written patient files. In order to contextualise findings from the audit and provide a  
50 deeper understanding of current practices, the audit will be supplemented with a small-scale  
51 qualitative study. One representative from each department included in the audit will be invited to  
52 participate in a semi-structured interview based on a short topic guide. This guide will include  
53 questions regarding reasons for current documentation of patients' rehabilitation needs;  
54 conceptualisation of physical, psychological and social rehabilitation needs in clinical encounters;  
55 perceived relevance of and evidence-base underpinning cancer rehabilitation; barriers for  
56  
57  
58  
59  
60

1  
2  
3  
4 identifying and meeting rehabilitation needs; and recommendations for how to integrate cancer  
5 rehabilitation into clinical practice. Audit data will be entered into SPSS and analysed using  
6 descriptive statistics. Interviews will be audiotaped and transcribed, and analysed using content  
7 analysis.[31]  
8  
9

## 10 11 **ETHICS AND DISSEMINATION**

12 Each of the substudies will be conducted in accordance with the ethical principles for medical  
13 research as described in the Declaration of Helsinki.[32] Securing the anonymity of respondents  
14 remains a challenge due to the nationwide design including potentially all municipalities in  
15 substudy 1 and all hospital departments involved in colorectal cancer treatment in substudy 2.  
16 However, findings will be presented in aggregated form and care will be taken to ensure that no  
17 respondents are identifiable. Sensitive data potentially identifying individual patients will be  
18 omitted before processing data from patient files in substudy 3, and patient files will be reviewed at  
19 the departments. All data will be securely stored and deleted upon completion of the study.  
20 No approval from ethical committees is needed for surveys and interview studies according to  
21 official Danish research guidelines. The study was approved by the Danish Data Protection Agency  
22 (j. No. 2013-41-1478) which is a national agency overseeing data collection and management.  
23  
24

25 During the developmental phase of this study, we have had a strong intention to firmly anchor the  
26 study within real-life clinical and community encounters between cancer patients on the one hand  
27 and the professionals and organisations responsible for securing comprehensive, coordinated cancer  
28 rehabilitation across different phases and settings in the cancer treatment trajectory on the other. We  
29 have taken various measures to secure the usefulness of the survey instruments and to ensure  
30 appropriate reflexivity during analysis and dissemination of results e.g. by involving key  
31 representatives from municipalities and clinical practice in the design and execution of the study. In  
32 addition, the progression of the substudies and analysis of findings will be regularly discussed in a  
33 multidisciplinary research group (the CIRE research network) and at biannually meetings with a  
34 steering committee consisting of experienced researchers from both university and clinical  
35 departments.  
36  
37

38 The dissemination strategy of the study is informed by the same ambition to bridge the divide that  
39 at times leads to suboptimal communication and implementation of research findings into practice.  
40 Results from the three substudies will be published in international peer-reviewed scientific journals  
41 both separately and in a concluding paper combining findings across perspectives and  
42 methodologies. Furthermore, findings will be presented at conferences and seminars, internationally  
43 and in Denmark, and through short reports aimed at practitioners and policy-makers in a Danish  
44 context in order to secure communication of main findings and implications for practice for relevant  
45 stake-holders.  
46  
47

48  
49 **Funding:** The research is supported by grants from 'The Center for Integrated Rehabilitation of Cancer  
50 patients' (CIRE), a center established and supported by The Danish Cancer Society and The Novo Nordisk  
51 Foundation.  
52

53  
54 **Ethical approval:** Approval was obtained from the Danish Data Protection Agency (j. No. 2013-41-1478).  
55  
56  
57  
58  
59  
60

1  
2  
3  
4 **Contributors:** CH, LA and MK conceived the study and are involved in data collection, analysis and  
5 dissemination of the entire study. This paper was drafted by MK, and revised and edited by all authors. CH is  
6 guarantor.  
7

8 **Competing interests:** None.  
9  
10  
11  
12  
13  
14  
15  
16  
17  
18  
19  
20  
21  
22  
23  
24  
25  
26  
27  
28  
29  
30  
31  
32  
33  
34  
35  
36  
37  
38  
39  
40  
41  
42  
43  
44  
45  
46  
47  
48  
49  
50  
51  
52  
53  
54  
55  
56  
57  
58  
59  
60

For peer review only

**REFERENCES**

- 1 Hewitt M, Greenfield S, Stovall E. From Cancer Patient to Cancer Survivor: Lost in Transition. Institute of Medicine, National Academies of Sciences; 2005.
- 2 Stubblefield MD, Hubbard G, Cheville A, et al. Current perspectives and emerging issues on cancer rehabilitation. *Cancer* 2013;**119**:2170-2178.
- 3 Hellbom M, Bergelt C, Bergenmar M, et al. Cancer rehabilitation: A Nordic and European Perspective. *Acta Oncol* 2011;**50**:179-186.
- 4 von Heymann-Horan AB, Dalton SO, Dziekanska A, et al. Unmet needs of women with breast cancer during and after primary treatment: A prospective study in Denmark. *Acta Oncol* 2013;**52**:382-390.
- 5 Veloso AG, Sperling C, Holm LV, et al. Unmet needs in cancer rehabilitation during the early cancer trajectory - a nationwide patient survey. *Acta Oncol* 2013;**52**:372-381.
- 6 Dalton SO, Johansen C. New paradigms in planning cancer rehabilitation and survivorship. *Acta Oncol* 2013;**52**:194.
- 7 Hansen DG, Larsen PV, Holm LV, et al. Association between unmet needs and quality of life of cancer patients: a population-based study. *Acta Oncol* 2013;**52**:391-399.
- 8 Ross L, Petersen MA, Johnsen AT, et al. Are different groups of cancer patients offered rehabilitation to the same extent? A report from the population-based study "The Cancer Patient's World". *Support Care Cancer* 2012;**20**:1089-1100.
- 9 Holm LV, Hansen DG, Johansen C, et al. Participation in cancer rehabilitation and unmet needs: a population-based cohort study. *Support Care Cancer* 2012;**20**:2913-2924.
- 10 Gjerset GM. Rehabilitation in cancer survivors - with focus on physical activity. Faculty of Medicine, University of Oslo, Norway; 2012.

1  
2  
3  
4 11 Thorsen L, Gjerset GM, Loge JH, et al. Cancer patients' needs for rehabilitation services. *Acta*  
5 *Oncol* 2011;**50**:212-222.  
6  
7

8 12 Holm LV, Hansen DG, Larsen PV, et al. Social inequality in cancer rehabilitation: a population-  
9 based cohort study. *Acta Oncol* 2013;**52**:422.  
10  
11

12 13 Parry C, Kent EE, Forsythe LP, et al. Can't see the forest for the care plan: a call to revisit the  
13 context of care planning. *J Clin Oncol* 2013;**31**:2651-2653.  
14  
15

16 14 Andersen RM. Revisiting the behavioral model and access to medical care: does it matter? *J*  
17 *Health Soc Behav* 1995;**36**:1-10.  
18  
19

20 15 Carlson LE, Waller A, Mitchell AJ. Screening for distress and unmet needs in patients with  
21 cancer: review and recommendations. *J Clin Oncol* 2012;**30**:1160-1177.  
22  
23

24 16 Chubak J, Tuzzio L, Hsu C, et al. Providing care for cancer survivors in integrated health care  
25 delivery systems: practices, challenges, and research opportunities. *Health Policy* 2012;**8**:184-189.  
26  
27

28 17 Forsythe LP, Alfano CM, Leach CR, et al. Who provides psychosocial follow-up care for post-  
29 treatment cancer survivors? A survey of medical oncologists and primary care physicians. *J Clin*  
30 *Oncol* 2012;**30**:2897-2905.  
31  
32

33 18 Alfano CM, Ganz PA, Rowland JH, et al. Cancer survivorship and cancer rehabilitation:  
34 revitalizing the link. *J Clin Oncol* 2012;**30**:904-906.  
35  
36

37 19 Richards M, Corner J, Maher J. The National Cancer Survivorship Initiative: new and emerging  
38 evidence on the ongoing needs of cancer survivors. *Br J Cancer* 2011;**105**:1-4.  
39  
40

41 20 National Institute for Clinical Excellence. Guidance on Cancer Services. Improving Supportive  
42 and Palliative Care for Adults with Cancer. The Manual. NHS: National Institute for Clinical  
43 Excellence; 2004.  
44  
45

46 21 Rudkjøbing A, Olejaz M, Birk HO, et al. Integrated care: a Danish perspective. *BMJ*  
47 2012;**345**(e4451).  
48  
49  
50  
51  
52

- 1  
2  
3  
4 22 National Board of Health. Forløbsprogram for rehabilitering og palliation i forbindelse med  
5 kræft - del af samlet forløbsprogram for kræft 2012. [Care programme for rehabilitation and  
6 palliation in cancer - part of the total care programme for cancer 2012]. Copenhagen: 2012.  
7  
8  
9  
10 23 National Board of Health. Pakkeforløb for kræft i tyk- og endetarm. [Integrated care plan for  
11 colorectal cancer]. Copenhagen: 2012.  
12  
13  
14 24 de Vries E, Soerjomataram I, Lemmens VEPP, et al. Lifestyle changes and reduction of colon  
15 cancer incidence in Europe: A scenario study of physical activity promotion and weight reduction.  
16 Eur J Cancer 2010;**46**:2605-2616.  
17  
18  
19 25 Van Mossel C, Leitz L, Scott S, et al. Information needs across the colorectal cancer care  
20 continuum: scoping the literature. Eur J Cancer Care (Engl) 2012;**21**:296-320.  
21  
22  
23 26 Frederiksen BL, Osler M, Harling H, et al. Do patient characteristics, disease, or treatment  
24 explain social inequality in survival from colorectal cancer? Soc Sci Med 2009;**69**:1107-1115.  
25  
26  
27 27 Ferlay J, Steliarova-Foucher E, Lortet-Tieulent J, et al. Cancer incidence and mortality patterns  
28 in Europe: Estimates for 40 countries in 2012. Eur J Cancer 2013;**49**:1374-1403.  
29  
30  
31 28 Tariq S, Woodman J. Using mixed methods in health research. JRSM Short Rep 2013;**4**:1-8.  
32  
33  
34 29 Kehlet H, Slim K. The future of fast-track surgery. Br J Surg 2012;**99**:1026.  
35  
36  
37 30 National Institute for Clinical Excellence. Principles for best practice in clinical audit. Radcliffe  
38 Medical Press Ltd; 2002.  
39  
40  
41 31 Guest G, MacQueen KM, Namey EE. Applied thematic analysis. Sage; 2011.  
42  
43  
44 32 World Medical Association. World Medical Association Declaration of Helsinki. Ethical  
45 Principles for Medical Research Involving Human Subjects. 2008.  
46  
47  
48  
49 <http://www.wma.net/en/30publications/10policies/b3/17c.pdf> (accessed 1 Jul 2013)  
50  
51  
52  
53  
54  
55  
56  
57  
58  
59  
60



**Readiness for cancer rehabilitation in Denmark: protocol for  
a cross-sectional  
mixed methods study**

|                                    |                                                                                                                                                                                                                                                                                           |
|------------------------------------|-------------------------------------------------------------------------------------------------------------------------------------------------------------------------------------------------------------------------------------------------------------------------------------------|
| Journal:                           | <i>BMJ Open</i>                                                                                                                                                                                                                                                                           |
| Manuscript ID:                     | bmjopen-2013-003775.R1                                                                                                                                                                                                                                                                    |
| Article Type:                      | Protocol                                                                                                                                                                                                                                                                                  |
| Date Submitted by the Author:      | 09-Oct-2013                                                                                                                                                                                                                                                                               |
| Complete List of Authors:          | Kristiansen, Maria; University of Copenhagen, Department of Public Health<br>Adamsen, Lis; Copenhagen University Hospital, UCSF<br>Hendriksen, Carsten; Copenhagen University, Faculty of Health, Institute of<br>Public Health                                                           |
| <b>Primary Subject<br>Heading</b>: | Oncology                                                                                                                                                                                                                                                                                  |
| Secondary Subject Heading:         | Health services research                                                                                                                                                                                                                                                                  |
| Keywords:                          | REHABILITATION MEDICINE, Adult oncology < ONCOLOGY, Organisation of<br>health services < HEALTH SERVICES ADMINISTRATION & MANAGEMENT,<br>Quality in health care < HEALTH SERVICES ADMINISTRATION &<br>MANAGEMENT, Protocols & guidelines < HEALTH SERVICES<br>ADMINISTRATION & MANAGEMENT |
|                                    |                                                                                                                                                                                                                                                                                           |

SCHOLARONE™  
Manuscripts

1  
2  
3  
4  
5 **Readiness for cancer rehabilitation in Denmark: protocol for a cross-sectional**  
6 **mixed methods study**  
7

8 Maria Kristiansen, Lis Adamsen, Carsten Hendriksen  
9

10  
11  
12 Department of Public Health, University of Copenhagen, Oester Farimagsgade 5A, 1014  
13 Copenhagen K, Denmark.

14 Maria Kristiansen, associate professor

15 Lis Adamsen, professor

16 Carsten Hendriksen, associate professor  
17  
18  
19  
20  
21  
22  
23

24 Correspondence to: Maria Kristiansen

25 Email: Makk@sund.ku.dk

26 Telephone: +45 35326250

27 Fax: +45 35327629  
28  
29  
30  
31  
32

33  
34 Keywords: rehabilitation medicine, adult oncology, organisation of health services, quality of health  
35 care, protocols & guidelines  
36  
37  
38  
39  
40  
41  
42  
43  
44  
45  
46  
47  
48  
49  
50  
51  
52  
53  
54  
55  
56  
57  
58  
59  
60



## ABSTRACT

**Introduction:** Rehabilitation is a key element in most cancer care policies in recognition of the often unmet physical, psychological and social needs among rising numbers of cancer patients. A systematic assessment of patients' needs and available rehabilitation services constitute the foundation for timely, comprehensive, and coordinated cancer rehabilitation. This study aims to provide insight into the current organisation and practice of cancer rehabilitation in Denmark with special emphasis placed upon assessments of patients' needs and availability of services across the cancer treatment trajectory.

**Methods and analysis:** A cross-sectional design using a mixed methods approach will be used in order to analyse the readiness for cancer rehabilitation in different sectors and from differing perspectives. Substudy 1 consists of an electronic survey among the 98 Danish municipalities and focuses on the availability and use of cancer rehabilitation services for patients with all types of cancers. In substudy 2, a survey among the 19 surgical and 12 oncological departments involved in colorectal cancer treatment in Denmark is conducted in order to describe the current clinical practice regarding assessment of rehabilitation needs and referral to services. Substudy 3 involves a retrospective clinical audit and semistructured interviews at 4 randomly selected surgical and oncological departments treating colorectal cancer patients in order to elucidate current needs assessment practices.

**Ethics and dissemination:** The study was approved by the Danish Data Protection Agency and will be conducted in accordance with the principles of the Helsinki Declaration. Representatives from municipalities and clinical practice are engaged in the design and execution of the study in order to ensure the usefulness of survey instruments, reflexive interpretation of data and transferral of implications into practice. Results will be published in international peer-reviewed scientific journals and presented at conferences, seminars and as short reports.

## ARTICLE SUMMARY

### Article focus

- This cross-sectional, mixed methods study explores the organisation and practice of cancer rehabilitation in Denmark with specific emphasis on assessments of patients' needs and availability of services in different phases of the cancer treatment trajectory.

### Key messages

- Systematic assessment of cancer patients' rehabilitation needs is a necessity in order to identify patients with unmet needs and refer these patients to appropriate rehabilitation services.
- There is a need for more attention to potential gaps between policies on cancer rehabilitation on the one hand and the emphasis placed on rehabilitation in actual patient-provider encounters in different phases of the cancer treatment trajectory on the other.

### Strengths and limitations of this study

- The study provides insight into current practices regarding assessment of patients' rehabilitation needs and referral to rehabilitation services in a cross-sectional perspective, thereby encompassing large parts of the care pathway from the onset of treatment in hospitals and into the community.
- The study will enable the identification of gaps between policies and practice, and point to strategies of overcoming these gaps. The findings from this study thus hold great potential both in informing future policy-making within the field of cancer rehabilitation and in enabling better implementation of these policies across different sectors of healthcare systems.
- The findings of this study are context-dependent as the organization of cancer rehabilitation (e.g. delineation of care responsibilities across sectors, out-of-pocket payments, and referral routes) vary between countries with impact on rehabilitation practices. Therefore, findings need to be properly contextualized and caution must be taken in transferring implications for practice to healthcare systems characterized by different funding, governance and provision compared to the Danish publicly funded healthcare system.

## INTRODUCTION

Increasing attention focuses on how to adapt healthcare systems to meet the complex physical, psychological and social needs among the growing number of cancer patients.[1-3] Rehabilitation needs are complex and shaped by disease severity, the complexity of surgical and oncological treatments, as well as patient characteristics such as age, co-morbid conditions, health behaviour and socioeconomic position.[4,5] Principles underpinning cancer rehabilitation programmes are a biopsychosocial understanding of illness, focus on early assessment of needs and an emphasis on securing a continuous and tailored rehabilitation plan encompassing both needs and resources for the individual patients and his/her relatives.[2,3,6] Timely, comprehensive and coordinated cancer rehabilitation entails both systematic screening of those patients in need of rehabilitation services and it necessitates available and accessible high-quality services for the subgroup of patients who need organised cancer rehabilitation during and following cancer treatment. Throughout the cancer treatment trajectory, patients' physical, psychological and social needs may change and different service providers situated in primary care, at hospitals and in the communities where patients live are therefore relevant key persons in the cancer rehabilitation. Correspondingly, a multitude of interventions targeting rehabilitation needs should be made available for those who need help in managing the consequences of cancer. Cancer rehabilitation therefore comprises a wide range of activities such as physical training, psychological counselling, information on economic and work-related issues, and support groups.

In the research literature, unmet rehabilitation needs have been documented among a substantial proportion of current and former cancer patients with negative effect on quality of life, ability to return to work and morbidity.[5,7-12] Reasons for this suboptimal situation are complex and rooted in an interplay of patient-, provider- and organisational factors influencing access to and use of appropriate services.[13,14] Communication barriers in the patient-provider encounter and between providers, insufficient support for providers in screening for rehabilitation needs, suboptimal care coordination, lack of clear delineation of responsibility among providers, and a mismatch between available services and patient preferences are just some of these explanatory factors.[15-17] Calls have been made for more comprehensive cancer care plans that address the multitude of rehabilitation needs experienced by cancer patients and contextualise these needs in the immediate and wider social circumstances of each patient.[1,13,18] Several countries have developed policies seeking to integrate rehabilitation into the cancer treatment trajectory.[2,3,19,20] Implementing these policies into practice may be challenging, particularly as comprehensive cancer treatment trajectories involve a range of health and social care providers from primary and secondary care, and increasingly also community-based organisations including municipalities and patient organisations.

Within accelerated clinical care pathways, securing timely and systematic assessment of cancer patients' rehabilitation needs and subsequent referral to appropriate rehabilitation services across sectors and across time is a challenge that needs to be overcome if the potential benefits of comprehensive cancer rehabilitation services are to be realised. Insight into the current organisation of cancer rehabilitation is needed in order to analyse gaps between policy recommendations and practice and subsequently devise strategies enabling the realisation of the goal of coordinated, comprehensive cancer rehabilitation for those patients who need this.

Differences in the organisation and management of healthcare systems influence the organisation and management of cancer rehabilitation.[2] Geographical distances to services or lack of health

1  
2  
3  
4 insurance coverage may impede access to cancer rehabilitations in e.g. the U.S. whereas barriers in  
5 countries with tax-financed healthcare services covering populations living in smaller geographical  
6 areas may be of a different nature. This study explores cancer rehabilitation in Denmark which is a  
7 rather small country with a total of 5.6 million inhabitants. Politically and administratively,  
8 Denmark is divided into three levels each involved in the planning and delivery of healthcare  
9 services: the state, 5 regions and 98 municipalities.[21] The Danish cancer management programme  
10 published in 2012 outlines the overall integrated and coordinated organisation of cancer  
11 rehabilitation which has to be implemented by 2013.[22] In terms of cancer rehabilitation,  
12 municipalities are responsible for organising rehabilitation at a general level whereas hospitals are  
13 required to provide highly specialised rehabilitation for those patients who need this. Services are  
14 free of charge and time-limited involving a specified number of activities for each patient. Patients  
15 are referred to these services either by their general practitioner or by oncologists/medical staff at  
16 hospitals. In addition to this national cancer care plan, integrated care plans have been developed  
17 for specific cancers including colorectal cancer.[23]  
18  
19

20  
21 Our aim with this cross-sectional, mixed methods study is to provide insight into the organisation  
22 and practice of cancer rehabilitation in Denmark with special emphasis placed upon assessments of  
23 patients' needs and availability of services in different phases of cancer treatment trajectories  
24 involving different sections of the healthcare system. We explore this in three substudies. In  
25 substudy 1, the availability and use of cancer rehabilitation services targeting all types of cancers  
26 are explored in a survey among all Danish municipalities. In substudy 2 and 3, we narrow our focus  
27 to colorectal cancer patients who comprise a large, diverse and understudied group of cancer patients  
28 and in addition often experience multiple and complex rehabilitation needs.[24-27] In substudy 2,  
29 we use survey methodology to describe the current clinical practice regarding assessment of  
30 rehabilitation needs and referral to appropriate services in surgical and oncological departments  
31 treating patients with colorectal cancer. Finally in substudy 3, we conduct a clinical audit exploring  
32 the systematic identification and documentation of rehabilitation needs in patient files among four  
33 randomly selected surgical and oncological departments treating colorectal cancer patients.  
34  
35

36 By combining different perspectives and different methodologies, this study will enable the  
37 identification of gaps between the principles of comprehensive, coordinated rehabilitation as  
38 stipulated by the Danish cancer management programme and the current practice in the clinical  
39 encounter and after patients' transition to community-based cancer care. Insight into encountered  
40 barriers for cancer rehabilitation and strategies developed to overcome these barriers, may inform  
41 future development and implementation of policies seeking to integrate rehabilitation into the  
42 cancer treatment trajectory.  
43  
44

## 45 46 **METHODS AND ANALYSIS**

47 This study uses a cross-sectional design based on a mixed methods approach in order to analyse the  
48 readiness for rehabilitation in different phases of the cancer treatment trajectory.[28] The study is  
49 divided into three substudies, each of which will be conducted subsequently. Preliminary results of  
50 each substudy will feed into the design of the following substudy. Table 1 provides an overview of  
51 the aim, methodology, data sources/types of respondents and analysis of the three substudies.  
52  
53  
54

### 55 **Table 1: Overview of aim, methodology, data sources and analysis of each substudy**

56  
57  
58  
59  
60

| Substudy   | Aim                                                                                                                       | Methodology                                                | Data sources/respondents                                                                                                                                                                                   | Analysis                                       |
|------------|---------------------------------------------------------------------------------------------------------------------------|------------------------------------------------------------|------------------------------------------------------------------------------------------------------------------------------------------------------------------------------------------------------------|------------------------------------------------|
| Substudy 1 | Explores availability and use of cancer rehabilitation services in community-settings for all cancers                     | Nationwide survey                                          | Danish municipalities (n=98)                                                                                                                                                                               | Descriptive statistics and content analysis    |
| Substudy 2 | Explores assessment of rehabilitation needs and referral to services within clinical care for colorectal cancer patients  | Nationwide survey                                          | Danish surgical and oncological departments treating colorectal cancer (n=31)                                                                                                                              | Descriptive statistics and content analysis    |
| Substudy 3 | Explores the identification and documentation of rehabilitation needs within clinical care for colorectal cancer patients | Retrospective clinical audit<br><br>Qualitative interviews | Random sample of patient files (n=40) compiled from Danish surgical (n=2) and oncological (n=2) departments treating colorectal cancer<br>Representatives from each department involved in the audit (n=4) | Descriptive statistics<br><br>Content analysis |

In the following sections, each substudy will be described briefly.

### Substudy 1: nationwide survey among Danish municipalities

According to the Danish cancer management programme, all municipalities should offer cancer rehabilitation as of the beginning of 2013.[22] In order to capture the baseline situation and to lay the foundation for the following substudies, the data collection for substudy 1 was initiated in January 2013.

An electronic questionnaire consisting of 29 items measuring availability and use of cancer rehabilitation services is developed based on a review of cancer rehabilitation literature and cancer care policies. The review focuses on main factors found to influence the delivery of cancer rehabilitation services. In addition, we extract key recommendations made by the international scientific literature and by national guidelines detailing the provision of cancer rehabilitation services at the municipal level. During this review process, particular attention is paid to dimensions related to content, scope, timing and organisation of cancer rehabilitation services. Identified

1  
2  
3  
4 barriers for cancer rehabilitation are also included and inequality dimensions are incorporated. Main  
5 topics are identified, discussed and translated into survey items by a multidisciplinary group  
6 consisting of 4 cancer rehabilitation researchers. A combination of closed and open-ended questions  
7 is chosen in order to solicit additional information from respondents.

8 Items concern available rehabilitation services for cancer patients; reasons for not offering these  
9 services; target groups in terms of type of cancer, timing, setting and content of services;  
10 organisation of services including staffing, economic resources and collaboration with other public  
11 or private actors; number of patients enrolled in cancer rehabilitation; inequality in use across  
12 different patient groups in terms of type of cancer, sex, age, socioeconomic position and ethnicity,  
13 and perceived reasons for observed inequality; perception of and attitude towards cancer  
14 rehabilitation offered by municipalities; and needs and lessons learned in providing cancer  
15 rehabilitation. In addition, respondents are invited to send descriptions and evaluations of existing  
16 cancer rehabilitation services to the research team.

17  
18 When appropriate, respondents are able to choose more than one answer to questions, and they are  
19 able to skip sections of the questionnaire that do not apply to them (e.g. questions on content and  
20 use of services which are not applicable to those municipalities reporting that they do not offer  
21 cancer rehabilitation services) or questions that they do not know the answer to.

22 The questionnaire is pilot-tested by representatives from two municipalities; one situated in an  
23 urban context, one in a rural area in order to secure usefulness across geographical settings. The  
24 person in charge of cancer rehabilitation in these two municipalities is asked to complete the initial  
25 version of the questionnaire with emphasis on the content, scope and wording of questions as well  
26 as the completeness and appropriateness of response choices. In addition, a representative from an  
27 interest group and member authority for Danish municipalities (Local Government Denmark) is  
28 invited to comment on the questionnaire. Suggestions from these three sources are compiled and a  
29 number of revisions subsequently made.

30  
31 The person in charge of cancer rehabilitation services in each of the 98 Danish municipalities is  
32 identified through the websites of each municipality which details the organisational structure and  
33 responsibilities within the health department. In case of uncertainty, municipalities are contacted by  
34 telephone and asked to identify the person in charge of cancer rehabilitation services. At the  
35 beginning of the questionnaire, respondents are asked to provide background information detailing  
36 their professional background, title and length of employment as this may potentially influence the  
37 answers given. The questionnaire was sent via SurveyXact in January 2013. Two reminders are  
38 sent; one in written and one by telephone.

39  
40 Data will be analysed using descriptive statistics. Answers to open-ended questions will be coded  
41 using content analysis and statements that are considered illustrative for these data will be selected  
42 and used in the following presentation of results. All analyses are initially conducted independently  
43 by two researchers followed by comparison and discussion within the research group.

#### 44 45 46 47 **Substudy 2: nationwide electronic survey among surgical and oncological departments for** 48 **colorectal cancer patients**

49 Substudy 2 explores the current clinical practice regarding assessment of rehabilitation needs and  
50 referral to appropriate services in the 19 surgical and 12 oncological departments treating patients  
51 with colorectal cancer in Denmark. Data collection for this substudy started in July 2013.

52 Two electronic questionnaires have been developed; one for each type of department involved in  
53 colorectal cancer treatment. Most items (20 in total) are similar for the two types of respondents,  
54 however respondents from surgical departments are asked an additional question regarding the  
55 extent of implementation of fast-track programmes at the specific department as such programmes  
56  
57  
58  
59  
60

1  
2  
3  
4 may influence the ways in which cancer rehabilitation is conceptualised and reported in the  
5 survey.[29] As in substudy 1, we use a combination of closed and open-ended questions. Items  
6 measure types of disease-specific and general rehabilitation needs that are systematically assessed  
7 and documented; communication and collaboration within and across hospital departments (surgical  
8 and oncological departments) and across sectors (general practice and municipalities); referral to  
9 rehabilitation services and information provided to patients; and attitudes towards cancer  
10 rehabilitation emphasising on the perceived relevance of and the strength of the evidence-base  
11 underlying current rehabilitation services for colorectal cancer patients. Items are developed based  
12 on review of the scientific literature, as well as the Danish cancer management programme and the  
13 Danish integrated care plan for colorectal cancer.[22,23] Representatives from the Danish  
14 Colorectal Cancer Group are engaged in the development of the questionnaire and were invited in  
15 as collaborating partners during this substudy in order to secure the usefulness of the questionnaire  
16 and improve the likelihood that results will be translated into improvements of clinical practice.  
17 Particularly emphasis is placed upon the appropriateness of wordings and response choices that  
18 must reflect the opportunities available to clinicians working at large as well as small departments  
19 across different regions of the country. When appropriate, respondents may choose more than one  
20 answer to questions, and based on our experiences from substudy 1, we retain the possibility for  
21 respondents to skip sections of the questionnaire that do not apply to them or that they are unable to  
22 answer.  
23

24  
25 The size and management structures of departments treating colorectal cancer patients vary across  
26 Danish hospitals, and identifying the most relevant recipient poses a challenge. Questionnaires are  
27 therefore initially sent to all heads of departments via SurveyXact. These recipients are easily  
28 identifiable through the websites of each hospital. Each recipient is asked to forward the  
29 questionnaire to the relevant clinician in charge of the departments' colorectal cancer treatment  
30 programme. Two written reminders will be sent to non-responders followed by a reminder via  
31 telephone  
32

33 Data from closed-ended questions will be analysed using descriptive statistics. Answers to open-  
34 ended questions will be coded using content analysis. All analysis will be discussed at regular  
35 meetings within the research group.  
36  
37

### 38 **Substudy 3: retrospective clinical audit among four randomly selected surgical and** 39 **oncological departments for colorectal cancer patients**

40 In the final substudy, we conduct a retrospective clinical audit exploring the systematic  
41 identification and documentation of rehabilitation needs in patient files compiled from two surgical  
42 and two oncological departments treating colorectal cancer patients. The audit will measure current  
43 clinical practice within cancer rehabilitation up against the guidelines presented in the Danish  
44 cancer management programme and the Danish integrated care plan for colorectal cancer. The  
45 overall aim is to improve the quality of record keeping as well as the integration of rehabilitation  
46 into clinical practice. A total of 10 patient files (electronic and/or written dependent upon  
47 availability) will be extracted from each department resulting in a total of 40 patient files included.  
48 This sample size is chosen as it is assumed to be adequate for creating credible results regarding the  
49 current documentation of cancer rehabilitation in Danish clinical practice. Departments will be  
50 randomly selected among the 19 surgical and 12 oncological departments enrolled in substudy 2.  
51 No selection criteria will be enforced besides geographical spread in order to ensure attention to  
52 potential regional differences between eastern and western parts of Denmark. Departments will  
53 therefore be divided according to location (East or West Denmark) and type (surgical or oncological  
54 department). A lottery method of sampling will be used. Each department will be assigned a unique  
55  
56  
57  
58  
59  
60

1  
2  
3  
4 number; these numbers will be thoroughly mixed; and one number will be drawn from each  
5 subgroup of departments. This sampling process will result in the inclusion of one surgical and one  
6 oncological department from each of the two geographical regions of Denmark. The remaining  
7 departments will be assigned to a prioritised list following the same lottery methodology. Heads of  
8 departments will receive a written invitation to participate in the audit and, if needed, researchers  
9 will give oral presentations of the aim, methodology and expected outcome in terms of both  
10 research and suggestions for improved clinical practice. If this process does not lead to  
11 collaboration, the next department on the prioritised list will be approached.

12 Each surgical department will be asked to retrieve full patient files for the last 10 patients operated  
13 for colorectal cancer at the department. Due to the more prolonged treatment modules within  
14 oncology and to ensure that full care trajectories are covered in the audit, each oncological  
15 department will be asked to retrieve patient files for the last 10 patients who have been enrolled in  
16 treatment for at least 7 months.

17  
18 The clinical audit will be carried out in accordance with the Principles for Best Practice in clinical  
19 Audit published by the National Institute for Clinical Excellence.[30] The audit will focus on  
20 systematic documentation of patients' rehabilitation needs and referral to rehabilitation services in  
21 clinical practice. Explicit, measurable process criteria indicating assessment of patients'  
22 rehabilitation needs across the cancer treatment trajectory will be developed. Criteria will  
23 encompass direct measures for rehabilitation needs assessments (e.g. functional ability, co-morbid  
24 conditions, mental distress, social network structure) and indirect measures (e.g. referral to  
25 physiotherapy/dietician/psychologist, information given to the patient regarding municipal  
26 rehabilitation services). Patient files comprise – albeit with varying degrees of completeness -  
27 quantitative, standardised data e.g. related to waiting times, referral patterns, co-morbidity and  
28 functional ability, while data on social network structures, mental distress and information given to  
29 the patient often appear in free-text. Both quantitative and qualitative data will be retrieved and  
30 entered into a computer database. Since the aim of the substudy is to explore the systematic  
31 identification and documentation of rehabilitation needs in patient files, we will consider missing  
32 data as an important outcome-measure.

33  
34 Representatives from the involved departments will be engaged as collaborating partners as their  
35 active participation will help ensure both access to data from patient files, adequate selection of  
36 assessment criteria and measurement of performance, and not least the translation of findings into  
37 improvements of clinical practice.[30] Patient files will be systematically reviewed by two  
38 independent and trained reviewers; one from the research team and one representative from the  
39 specific department in order to secure validity and consistency in the measurement of performance.  
40 Ratings will be compared and consensus sought between reviewers.

41  
42 The audit methodology is based on measurable indicators of cancer rehabilitation as identified in  
43 electronic or written patient files. However, some aspects of cancer rehabilitation are more likely to  
44 be recorded than others and some activities may be indicated as performed in patient files whilst  
45 they were not fully implemented in actual clinical practice. In order to contextualise findings from  
46 the audit and provide a deeper understanding of current practices, the audit will be supplemented  
47 with a small-scale qualitative study. One representative from each department included in the audit  
48 will be invited to participate in a semi-structured interview after the completion of the first part of  
49 the audit. Written invitations to participate in a 30-60 minutes semi-structured interview will be sent  
50 to all medical doctors and nurses at the participating departments followed by oral presentations of  
51 the aim and focus of the interview if needed. Written and oral consent will be retrieved from  
52 interviewees and careful attention will be given to protecting their anonymity. This is particularly  
53 important as qualitative data may reveal discrepancies between recorded data in patient files  
54 informed by official clinical guidelines and real-life clinical decision-making that may fall short of  
55  
56  
57  
58  
59  
60



1  
2  
3  
4 the standard given in these guidelines. Interviews will be conducted at a time and place chosen by  
5 the interviewee. A short topic guide will be used and interviewees will be invited to elaborate on  
6 their answers. This guide will include a number of questions and discussion points based on a  
7 vignette constructed from the patient files in the first part of the audit. The following themes will be  
8 covered:  
9

- 10 a. When in the clinical care pathway would this patient's rehabilitation needs be  
11 assessed? By whom? How?
- 12 b. Would this differ between different patient groups e.g. related to degree of disease  
13 severity, socioeconomic status, age or co-morbidity?
- 14 c. How is rehabilitation needs conceptualised and weighted (physical, psychological,  
15 social rehabilitation needs)?
- 16 d. How would the assessment of the needs for rehabilitation be documented in the  
17 patient's file? By whom? And to what extent?
- 18 e. What are the perceived responsibilities and competencies in assessing and  
19 documenting rehabilitation needs among nurses and medical doctors?
- 20 f. Is the assessment and documentation of needs informed by national policies and  
21 guidelines? Why or why not?
- 22 g. What is the perceived relevance of integrating cancer rehabilitation into clinical  
23 practice? How strong is the evidence-base?
- 24 h. Are there barriers at the patient-, professional- and/or organisational level that  
25 influence your ability to identify rehabilitation needs?
- 26 i. How can assessment of rehabilitation needs among colorectal cancer patients be  
27 integrated more systematically into clinical practice?  
28  
29

30  
31 Audit data will be entered into SPSS and analysed using descriptive statistics. Interviews will be  
32 audiotaped and transcribed, and analysed using content analysis.[31] To ensure reflexivity,  
33 emergent findings from the analysis of qualitative data will be discussed within the research  
34 group.  
35  
36

### 37 **ETHICS AND DISSEMINATION**

38 Each of the substudies will be conducted in accordance with the ethical principles for medical  
39 research as described in the Declaration of Helsinki.[32] Securing the anonymity of respondents  
40 remains a challenge due to the nationwide design including potentially all municipalities in  
41 substudy 1 and all hospital departments involved in colorectal cancer treatment in substudy 2.  
42 However, findings will be presented in aggregated form and care will be taken to ensure that no  
43 respondents are identifiable. Sensitive data potentially identifying individual patients will be  
44 omitted before processing data from patient files in substudy 3, and patient files will be reviewed at  
45 the departments. All data will be securely stored and deleted upon completion of the study.  
46 No approval from ethical committees is needed for surveys and interview studies according to  
47 official Danish research guidelines. The study was approved by the Danish Data Protection Agency  
48 (j. No. 2013-41-1478) which is a national agency overseeing data collection and management.  
49  
50

51  
52 During the developmental phase of this study, we have had a strong intention to firmly anchor the  
53 study within real-life clinical and community encounters between cancer patients on the one hand  
54 and the professionals and organisations responsible for securing comprehensive, coordinated cancer  
55 rehabilitation across different phases and settings in the cancer treatment trajectory on the other. We  
56 have taken various measures to secure the usefulness of the survey instruments and to ensure  
57  
58  
59  
60

1  
2  
3  
4 appropriate reflexivity during analysis and dissemination of results e.g. by involving key  
5 representatives from municipalities and clinical practice in the design and execution of the study. In  
6 addition, the progression of the substudies and analysis of findings will be regularly discussed in a  
7 multidisciplinary research group (the CIRE research network) and at biannually meetings with a  
8 steering committee consisting of experienced researchers from both university and clinical  
9 departments.  
10

11  
12 The dissemination strategy of the study is informed by the same ambition to bridge the divide that  
13 at times leads to suboptimal communication and implementation of research findings into practice.  
14 Results from the three substudies will be published in international peer-reviewed scientific journals  
15 both separately and in a concluding paper combining findings across perspectives and  
16 methodologies. Furthermore, findings will be presented at conferences and seminars, internationally  
17 and in Denmark, and through short reports aimed at practitioners and policy-makers in a Danish  
18 context in order to secure communication of main findings and implications for practice for relevant  
19 stake-holders.  
20

21  
22  
23 **Funding:** The research is supported by grants from 'The Center for Integrated Rehabilitation of Cancer  
24 patients' (CIRE), a center established and supported by The Danish Cancer Society and The Novo Nordisk  
25 Foundation.  
26

27 **Ethical approval:** Approval was obtained from the Danish Data Protection Agency (j. No. 2013-41-1478).  
28

29 **Contributors:** CH, LA and MK conceived the study and are involved in data collection, analysis and  
30 dissemination of the entire study. This paper was drafted by MK, and revised and edited by all authors. CH is  
31 guarantor.  
32

33 **Competing interests:** None.  
34  
35  
36  
37  
38  
39  
40  
41  
42  
43  
44  
45  
46  
47  
48  
49  
50  
51  
52  
53  
54  
55  
56  
57  
58  
59  
60

**REFERENCES**

- 1 Hewitt M, Greenfield S, Stovall E. From Cancer Patient to Cancer Survivor: Lost in Transition. Institute of Medicine, National Academies of Sciences; 2005.
- 2 Stubblefield MD, Hubbard G, Cheville A, et al. Current perspectives and emerging issues on cancer rehabilitation. *Cancer* 2013;**119**:2170-2178.
- 3 Hellbom M, Bergelt C, Bergenmar M, et al. Cancer rehabilitation: A Nordic and European Perspective. *Acta Oncol* 2011;**50**:179-186.
- 4 von Heymann-Horan AB, Dalton SO, Dziekanska A, et al. Unmet needs of women with breast cancer during and after primary treatment: A prospective study in Denmark. *Acta Oncol* 2013;**52**:382-390.
- 5 Veloso AG, Sperling C, Holm LV, et al. Unmet needs in cancer rehabilitation during the early cancer trajectory - a nationwide patient survey. *Acta Oncol* 2013;**52**:372-381.
- 6 Dalton SO, Johansen C. New paradigms in planning cancer rehabilitation and survivorship. *Acta Oncol* 2013;**52**:194.
- 7 Hansen DG, Larsen PV, Holm LV, et al. Association between unmet needs and quality of life of cancer patients: a population-based study. *Acta Oncol* 2013;**52**:391-399.
- 8 Ross L, Petersen MA, Johnsen AT, et al. Are different groups of cancer patients offered rehabilitation to the same extent? A report from the population-based study "The Cancer Patient's World". *Support Care Cancer* 2012;**20**:1089-1100.
- 9 Holm LV, Hansen DG, Johansen C, et al. Participation in cancer rehabilitation and unmet needs: a population-based cohort study. *Support Care Cancer* 2012;**20**:2913-2924.
- 10 Gjerset GM. Rehabilitation in cancer survivors - with focus on physical activity. Faculty of Medicine, University of Oslo, Norway; 2012.

1  
2  
3  
4 11 Thorsen L, Gjerset GM, Loge JH, et al. Cancer patients' needs for rehabilitation services. *Acta*  
5 *Oncol* 2011;**50**:212-222.

6  
7  
8 12 Holm LV, Hansen DG, Larsen PV, et al. Social inequality in cancer rehabilitation: a population-  
9 based cohort study. *Acta Oncol* 2013;**52**:422.

10  
11  
12 13 Parry C, Kent EE, Forsythe LP, et al. Can't see the forest for the care plan: a call to revisit the  
13 context of care planning. *J Clin Oncol* 2013;**31**:2651-2653.

14  
15  
16 14 Andersen RM. Revisiting the behavioral model and access to medical care: does it matter? *J*  
17 *Health Soc Behav* 1995;**36**:1-10.

18  
19  
20 15 Carlson LE, Waller A, Mitchell AJ. Screening for distress and unmet needs in patients with  
21 cancer: review and recommendations. *J Clin Oncol* 2012;**30**:1160-1177.

22  
23  
24 16 Chubak J, Tuzzio L, Hsu C, et al. Providing care for cancer survivors in integrated health care  
25 delivery systems: practices, challenges, and research opportunities. *Health Policy* 2012;**8**:184-189.

26  
27  
28 17 Forsythe LP, Alfano CM, Leach CR, et al. Who provides psychosocial follow-up care for post-  
29 treatment cancer survivors? A survey of medical oncologists and primary care physicians. *J Clin*  
30 *Oncol* 2012;**30**:2897-2905.

31  
32  
33 18 Alfano CM, Ganz PA, Rowland JH, et al. Cancer survivorship and cancer rehabilitation:  
34 revitalizing the link. *J Clin Oncol* 2012;**30**:904-906.

35  
36  
37 19 Richards M, Corner J, Maher J. The National Cancer Survivorship Initiative: new and emerging  
38 evidence on the ongoing needs of cancer survivors. *Br J Cancer* 2011;**105**:1-4.

39  
40  
41 20 National Institute for Clinical Excellence. Guidance on Cancer Services. Improving Supportive  
42 and Palliative Care for Adults with Cancer. The Manual. NHS: National Institute for Clinical  
43 Excellence; 2004.

44  
45  
46 21 Rudkjøbing A, Olejaz M, Birk HO, et al. Integrated care: a Danish perspective. *BMJ*  
47 2012;**345**(e4451).

- 1  
2  
3  
4 22 National Board of Health. Forløbsprogram for rehabilitering og palliation i forbindelse med  
5 kræft - del af samlet forløbsprogram for kræft 2012. [Care programme for rehabilitation and  
6 palliation in cancer - part of the total care programme for cancer 2012]. Copenhagen: 2012.  
7  
8  
9  
10 23 National Board of Health. Pakkeforløb for kræft i tyk- og endetarm. [Integrated care plan for  
11 colorectal cancer]. Copenhagen: 2012.  
12  
13  
14 24 de Vries E, Soerjomataram I, Lemmens VEPP, et al. Lifestyle changes and reduction of colon  
15 cancer incidence in Europe: A scenario study of physical activity promotion and weight reduction.  
16 Eur J Cancer 2010;**46**:2605-2616.  
17  
18  
19 25 Van Mossel C, Leitz L, Scott S, et al. Information needs across the colorectal cancer care  
20 continuum: scoping the literature. Eur J Cancer Care (Engl) 2012;**21**:296-320.  
21  
22  
23 26 Frederiksen BL, Osler M, Harling H, et al. Do patient characteristics, disease, or treatment  
24 explain social inequality in survival from colorectal cancer? Soc Sci Med 2009;**69**:1107-1115.  
25  
26  
27 27 Ferlay J, Steliarova-Foucher E, Lortet-Tieulent J, et al. Cancer incidence and mortality patterns  
28 in Europe: Estimates for 40 countries in 2012. Eur J Cancer 2013;**49**:1374-1403.  
29  
30  
31 28 Tariq S, Woodman J. Using mixed methods in health research. JRSM Short Rep 2013;**4**:1-8.  
32  
33  
34 29 Kehlet H, Slim K. The future of fast-track surgery. Br J Surg 2012;**99**:1026.  
35  
36  
37 30 National Institute for Clinical Excellence. Principles for best practice in clinical audit. Radcliffe  
38 Medical Press Ltd; 2002.  
39  
40  
41 31 Guest G, MacQueen KM, Namey EE. Applied thematic analysis. Sage; 2011.  
42  
43  
44 32 World Medical Association. World Medical Association Declaration of Helsinki. Ethical  
45 Principles for Medical Research Involving Human Subjects. 2008.  
46  
47  
48  
49 <http://www.wma.net/en/30publications/10policies/b3/17c.pdf> (accessed 1 Jul 2013)  
50  
51  
52  
53  
54  
55  
56  
57  
58  
59  
60
